# Supplementary material
Source: publisher figshare collection journal article supplement (https://acs.figshare.com/ndownloader/files/5815479)
Supplement: Supplementary file 1 [file 5815479]

##### Coupled Cluster Theory Determination of the Heats of Formation

##### of Combustion-related Compounds:

##### CO, HCO, CO2, HCO2, HOCO, HC(O)OH and HC(O)OOH

David Feller* and David A. Dixon, William R. Wiley Environmental Molecular Sciences Laboratory, Pacific Northwest National Laboratory, MS K8-91, P.O. Box 999, Richland, Washington 99352 and Joseph S. Francisco, Department of Chemistry, H. C. Brown Laboratory, Purdue University, West Lafayette, Indiana 47907-1393

**Supporting Information Available.** One table listing the frozen core CCSD(T) total energies and electronic (vibrationless) atomization energies from aug-cc-pVDZ and aug-cc-pVTZ Basis Set Calculations.

**Table SM-1**. Frozen Core CCSD(T) Total Energies and Electronic (Vibrationless) Atomization Energies from aVDZ and aVTZ Basis Set Calculations a

| **CO (1+)** | |  |  |
| --- | --- | --- | --- |
| Basis Set | ERCCSD(T) | De |  |
| aVDZ | -113.074053 | 240.85 |  |
| aVTZ | -113.162194 | 255.22 |  |
|  |  |  |  |
| **HCO (2A’)** | |  |  |
| Basis Set | ERCCSD(T) | De |  |
| aVDZ | -113.599776 | 257.41 |  |
| aVTZ | -113.692160 | 271.15 |  |
|  | |  |  |
| **CO2 (1g+)** | |  |  |
| Basis Set | ERCCSD(T) | De |  |
| aVDZ | -188.186053 | 357.90 |  |
| aVTZ | -188.340593 | 377.58 |  |

| **HCO2 (2B2/)** | |  |  |
| --- | --- | --- | --- |
| Basis Set | ERCCSD(T) | De |  |
| aVDZ | -188.672545 | 349.84 |  |
| aVTZ | -188.827271 | 369.34 |  |
|  |  |  |  |
| **HCO2 (2A’/)** | |  |  |
| Basis Set | ERCCSD(T) | De |  |
| aVDZ | -188.670020 | 348.26 |  |
| aVTZ | -188.824493 | 367.59 |  |
|  |  |  |  |
| **HCO2 (2A1/)** | |  |  |
| Basis Set | ERCCSD(T) | De |  |
| aVDZ | -188.669629 | 348.01 |  |
| aVTZ | -188.825304 | 368.10 |  |
|  |  |  |  |
| **HCO2 (2A2/)** | |  |  |
| Basis Set | ERCCSD(T) | De |  |
| aVDZ | -188.65543 | 339.10 |  |
| aVTZ | -188.81003 | 358.52 |  |

Table 1. (continued)

| **HOCO (2A)** | |  |  |
| --- | --- | --- | --- |
| Basis Set | ERCCSD(T) | De |  |
| aVDZ | -188.695026 | 363.95 |  |
| aVTZ | -188.851363 | 384.45 |  |
|  |  |  |  |
| **HC(O)OH (1’)** | |  |  |
| Basis Set | ERCCSD(T) | De |  |
| aVDZ | -189.356187 | 465.50 |  |
| aVTZ | -189.517766 | 488.98 |  |
|  |  |  |  |
| **HC(O)OOH (1’)** | |  |  |
| Basis Set | ERCCSD(T) | De |  |
| aVDZ | -264.330490 | 496.14 |  |
| aVTZ | -264.554913 | 525.70 |  |

aTotal energies are given in hartrees (Eh) at the optimized CCSD(T) geometries. Atomization energies are in kcal/mol with respect to RCCSD(T) atoms in which no orbital symmetry equivalencing was imposed.
